# Supplementary material for: Human-Induced Neurons from Presenilin 1 Mutant Patients Model Aspects of Alzheimer’s Disease Pathology
Source: PubMed Central journal article supplement (PMC7037274; doi:10.3390/ijms21031030), 2020-02-04
Supplement: ijms-21-01030-s001.pdf [file ijms-21-01030-s001.pdf]

| Mutation | Patient ID | iPSC Clone | Oct4 Sox2 | TRA_1-60 | TRA_1-81 | iN | MAP2 | NeuN | RyR2 |   |
|----------|------------|------------|-----------|----------|----------|----|------|------|------|---|
| Control  | AG09429    | 17         | +         | +        | +        | +  | +    | +    | +    |   |
|          |            | 37         | +         | -        | +        | +  | +    | +    | +    |   |
|          |            | 38         | +         | +        | +        | +  | +    | +    | +    |   |
|          |            | AG02262    | 46        | +        | +        | +  | +    | +    | +    | + |
|          |            | CW60109    | 67        | +        | +        | +  | +    | +    | +    | + |
| A246E    | AD         | AG08711    | 11        | +        | +        | +  | +    | +    | +    |   |
|          |            |            | 25        | +        | +        | +  | +    | +    | +    |   |
|          |            |            | 26        | +        | +        | +  | +    | +    | +    |   |
| A246E    |            | AG08170    | 49        | +        | +        | +  | +    | +    | +    |   |
| M146L    |            | AG08446    | 60        | +        | +        | +  | +    | +    | +    |   |

**Supplemental Table 1: Generated iPSCs and HiN display mature neuronal markers.**

Conversion from fibroblast to iPSC was confirmed by the emergence of the expression of OCT-4, SOX2 as measured by qRT-PCR and TRA 1-60 and TRA-181 by IFA. Conversion of iPSC to human induced neurons was confirmed through a combination of qRT-PCR and IFA for the expression of mature neuronal markers of MAP2, NeuN, and RyR2. The ten HiN lines used for this project are shown, with 5 lines from non-AD and 5 lines from PS1 mutant AD

| Patient ID | Sex | Age | AD Mutation |
|------------|-----|-----|-------------|
| AG9429     | F   | 25  | N/A         |
| AG02262    | M   | 62  | N/A         |
| CW60109    | M   | 38  | N/A         |
| AG08711    | F   | 34  | A246E       |
| AG08170    | M   | 56  | A246E       |
| AG08446    | M   | 38  | M146L       |

**Supplemental Table 2: Patient Material Information.**

5 fibroblast samples (AG9429, AG02262, AG08711, AG08270, AG08446) and 1 iPSC sample (CW60109) were obtained from the Coriell Institute for Medical Research. Age, sex, and AD mutation are displayed where applicable.
